# Supplementary material for: Single‐cell transcriptomic analysis of gingivo‐buccal oral cancer reveals two dominant cellular programs
Source: PubMed Central journal article supplement — Cancer Sci. 2023 Oct 4;114(12):4732–46. doi: 10.1111/cas.15979 (PMC10728019; doi:10.1111/cas.15979), 2023-10-04

Figure S4:

UMAP plot showing epithelial cells (non-malignant and malignant epithelial cells identified by DP method), colored by (A) cluster (B) group, and (C) patient.

(A)

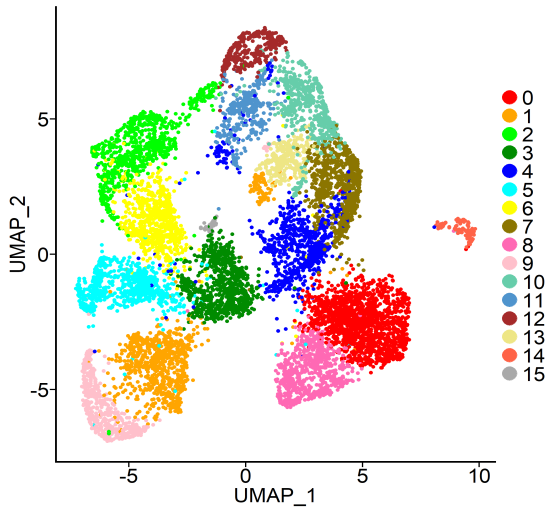

(B)

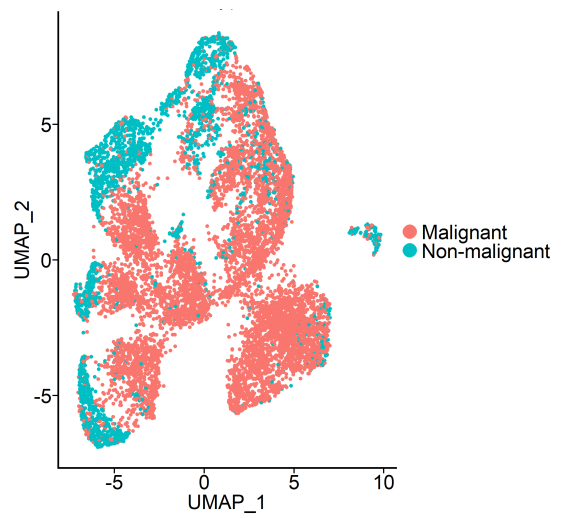

(C)

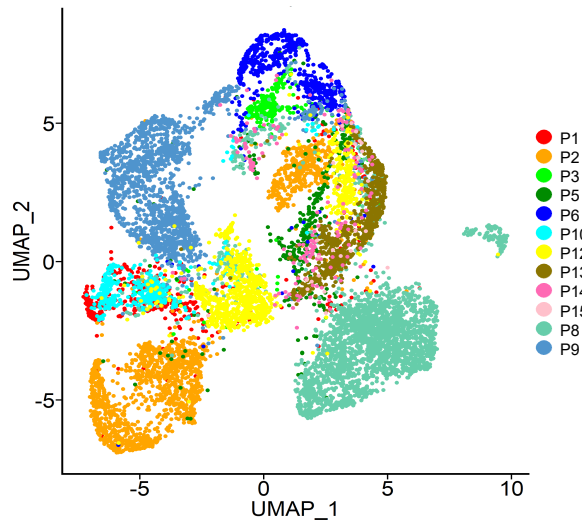

Supplement: CAS-114-4732-s002.pdf [file CAS-114-4732-s002.pdf]
