# Supplementary material for: Single‐cell transcriptomic analysis of gingivo‐buccal oral cancer reveals two dominant cellular programs
Source: PubMed Central journal article supplement — Cancer Sci. 2023 Oct 4;114(12):4732–46. doi: 10.1111/cas.15979 (PMC10728019; doi:10.1111/cas.15979), 2023-10-04

**Figure S3:**

UMAP plot of the expression patterns of cell-type marker genes. Each cell is denoted by a dot and the color intensity represents the gene expression level.

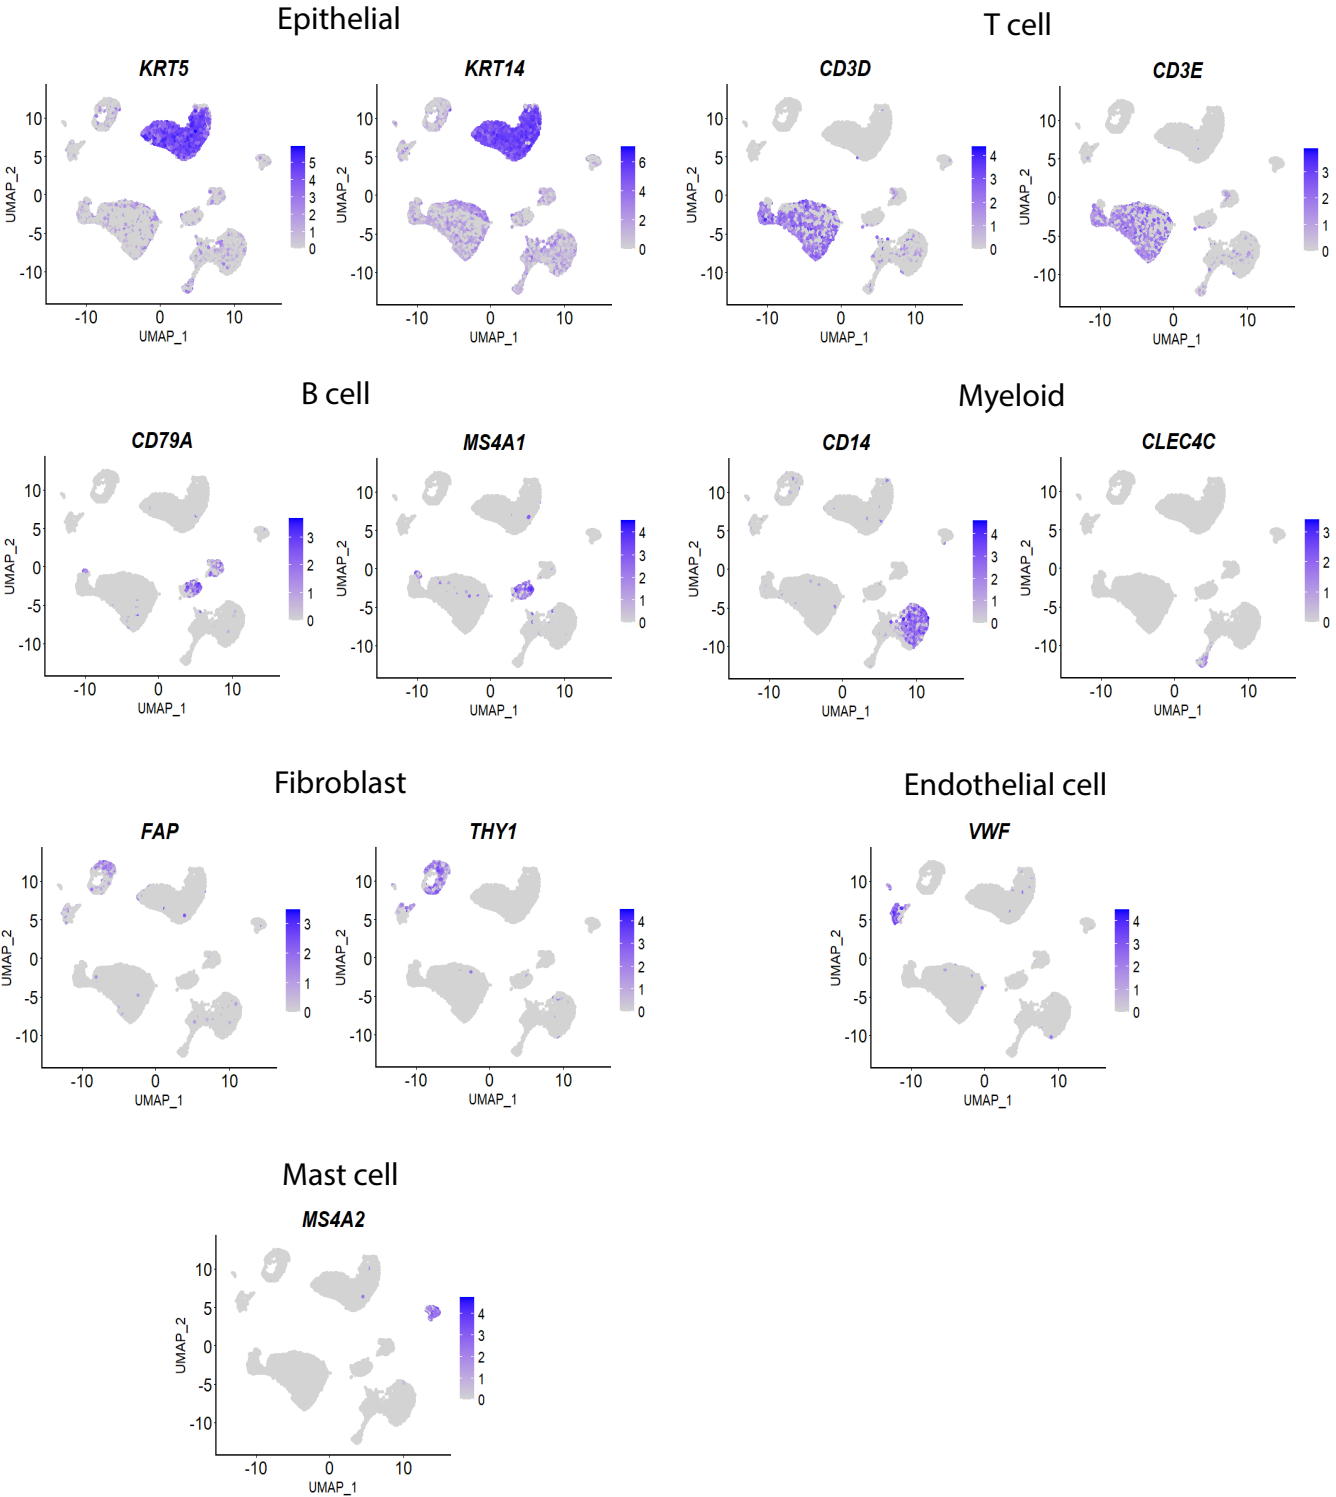

Supplement: CAS-114-4732-s005.pdf [file CAS-114-4732-s005.pdf]
