# Supplementary material for: Single‐cell transcriptomic analysis of gingivo‐buccal oral cancer reveals two dominant cellular programs
Source: PubMed Central journal article supplement — Cancer Sci. 2023 Oct 4;114(12):4732–46. doi: 10.1111/cas.15979 (PMC10728019; doi:10.1111/cas.15979), 2023-10-04

Figure S11:

(A) UMAP plot of expression profile of myeloid cells from 8 HNSCC patients (GSE164690). Each dot represents a cell. UMAP is colored by cluster. Feature plot showing expression levels of (B) anti-inflammatory, (C) pro-inflammatory, (D) M1 macrophages, and (E) M2 macrophage marker genes, across clusters. Each cell is denoted by a dot and the color intensity represents the gene expression level.

### GSE164690

(A)

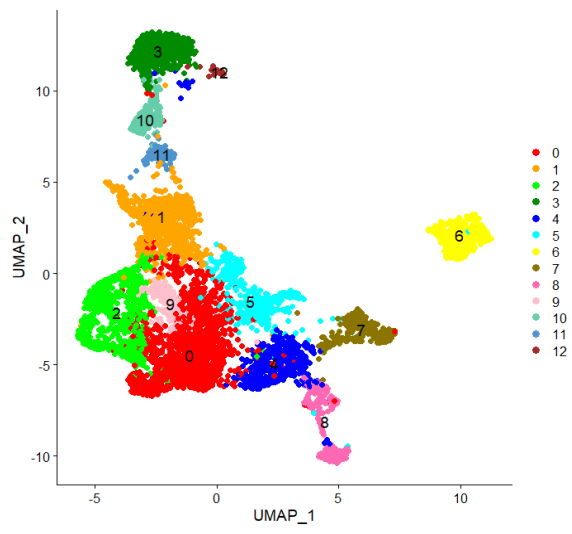

(B)

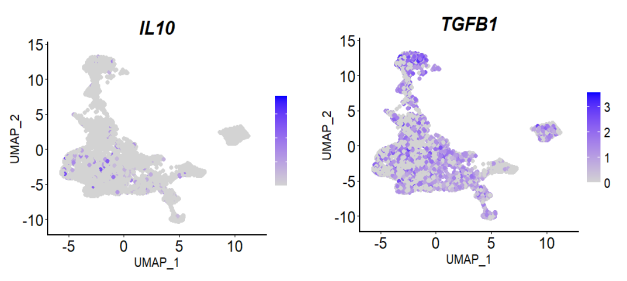

(C)

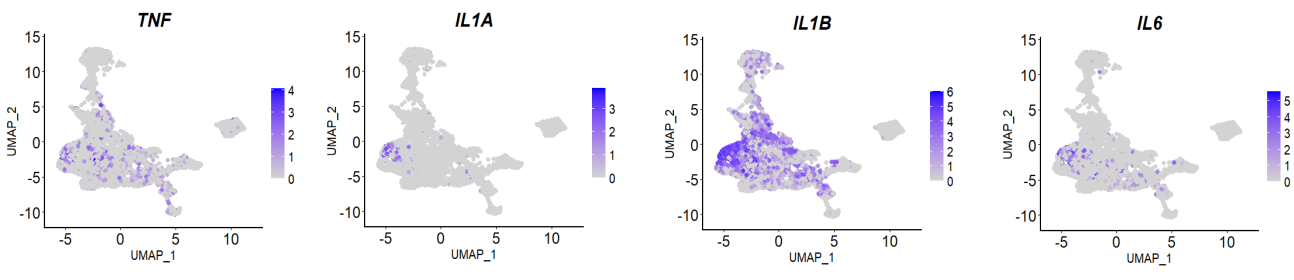

(D)

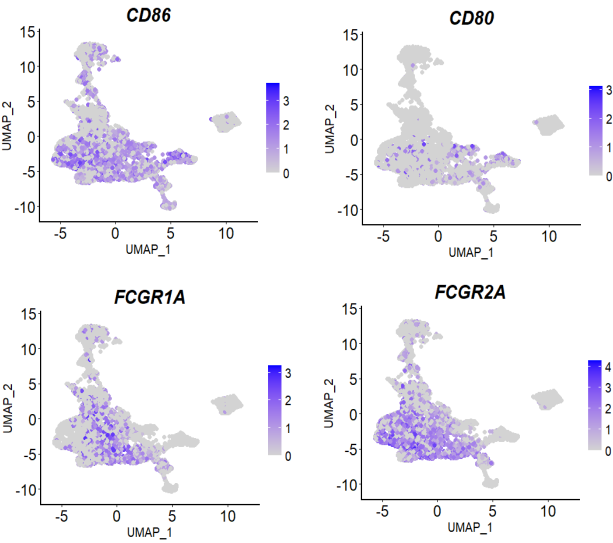

(E)

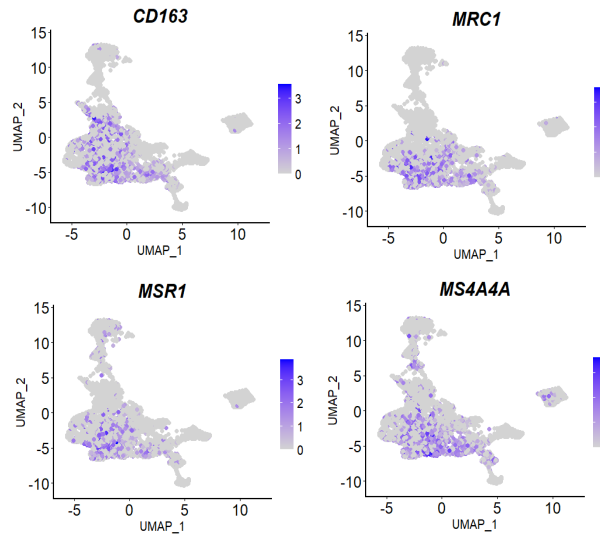

Supplement: CAS-114-4732-s006.pdf [file CAS-114-4732-s006.pdf]
