# Supplementary material for: Single‐cell transcriptomic analysis of gingivo‐buccal oral cancer reveals two dominant cellular programs
Source: PubMed Central journal article supplement — Cancer Sci. 2023 Oct 4;114(12):4732–46. doi: 10.1111/cas.15979 (PMC10728019; doi:10.1111/cas.15979), 2023-10-04

Figure S5:

Dot plot showing the average expression level of FOS, ATP1A1, and DUSP1 across patients. Genes are on the x-axis and Patient Identity on the y-axis, color represents the average gene expression level.

\* Indicates the clusters from Group 1.

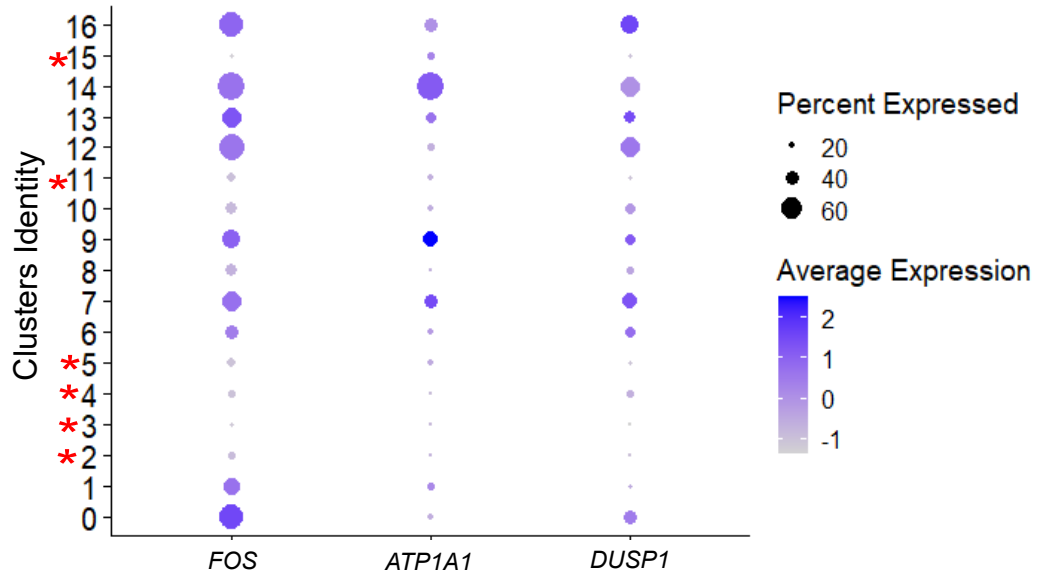

Supplement: CAS-114-4732-s010.pdf [file CAS-114-4732-s010.pdf]
