# Supplementary material for: Single‐cell transcriptomic analysis of gingivo‐buccal oral cancer reveals two dominant cellular programs
Source: PubMed Central journal article supplement — Cancer Sci. 2023 Oct 4;114(12):4732–46. doi: 10.1111/cas.15979 (PMC10728019; doi:10.1111/cas.15979), 2023-10-04

# Figure S15:

(A) UMAP plot of expression profile of fibroblast from 8 HNSCC patients (GSE164690). Each dot represents a cell. UMAP is colored by cluster. Feature plot showing distribution and expression of (B) cancer-associated fibroblast (CAF) and (C) myofibroblast-like CAF marker genes across clusters. Color intensity represents the gene expression level.

## GSE164690

(A)

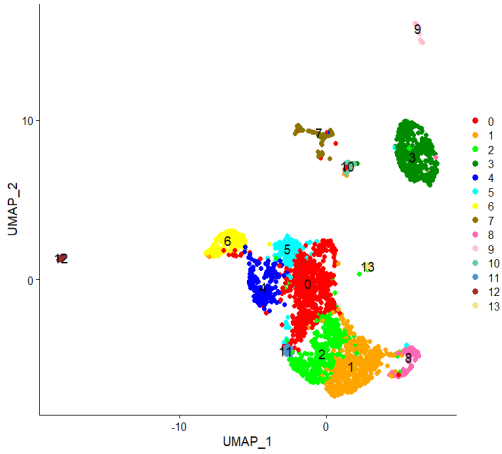

(B)

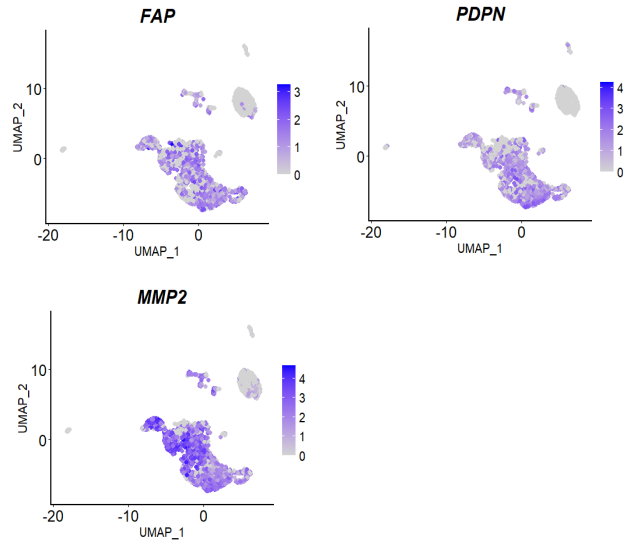

(C)

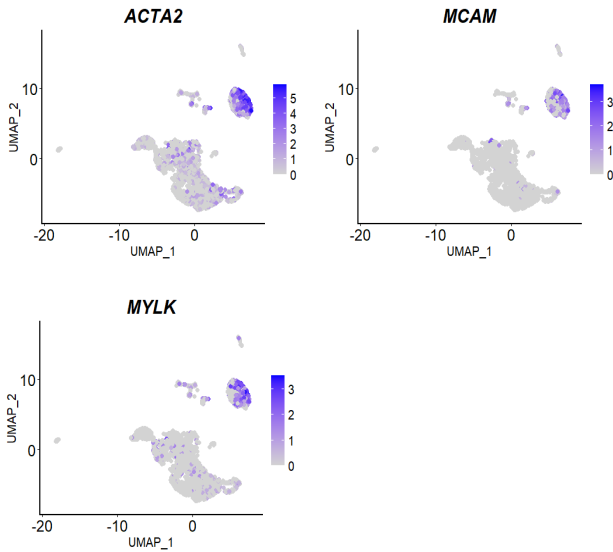

Supplement: CAS-114-4732-s013.pdf [file CAS-114-4732-s013.pdf]
