# Supplementary material for: Single‐cell transcriptomic analysis of gingivo‐buccal oral cancer reveals two dominant cellular programs
Source: PubMed Central journal article supplement — Cancer Sci. 2023 Oct 4;114(12):4732–46. doi: 10.1111/cas.15979 (PMC10728019; doi:10.1111/cas.15979), 2023-10-04

Figure S13:

Heatmap showing expression levels of the 10 most significantly differentially expressed genes across clusters of fibroblasts. Cluster identity are on the x-axis and gene names on the y-axis.

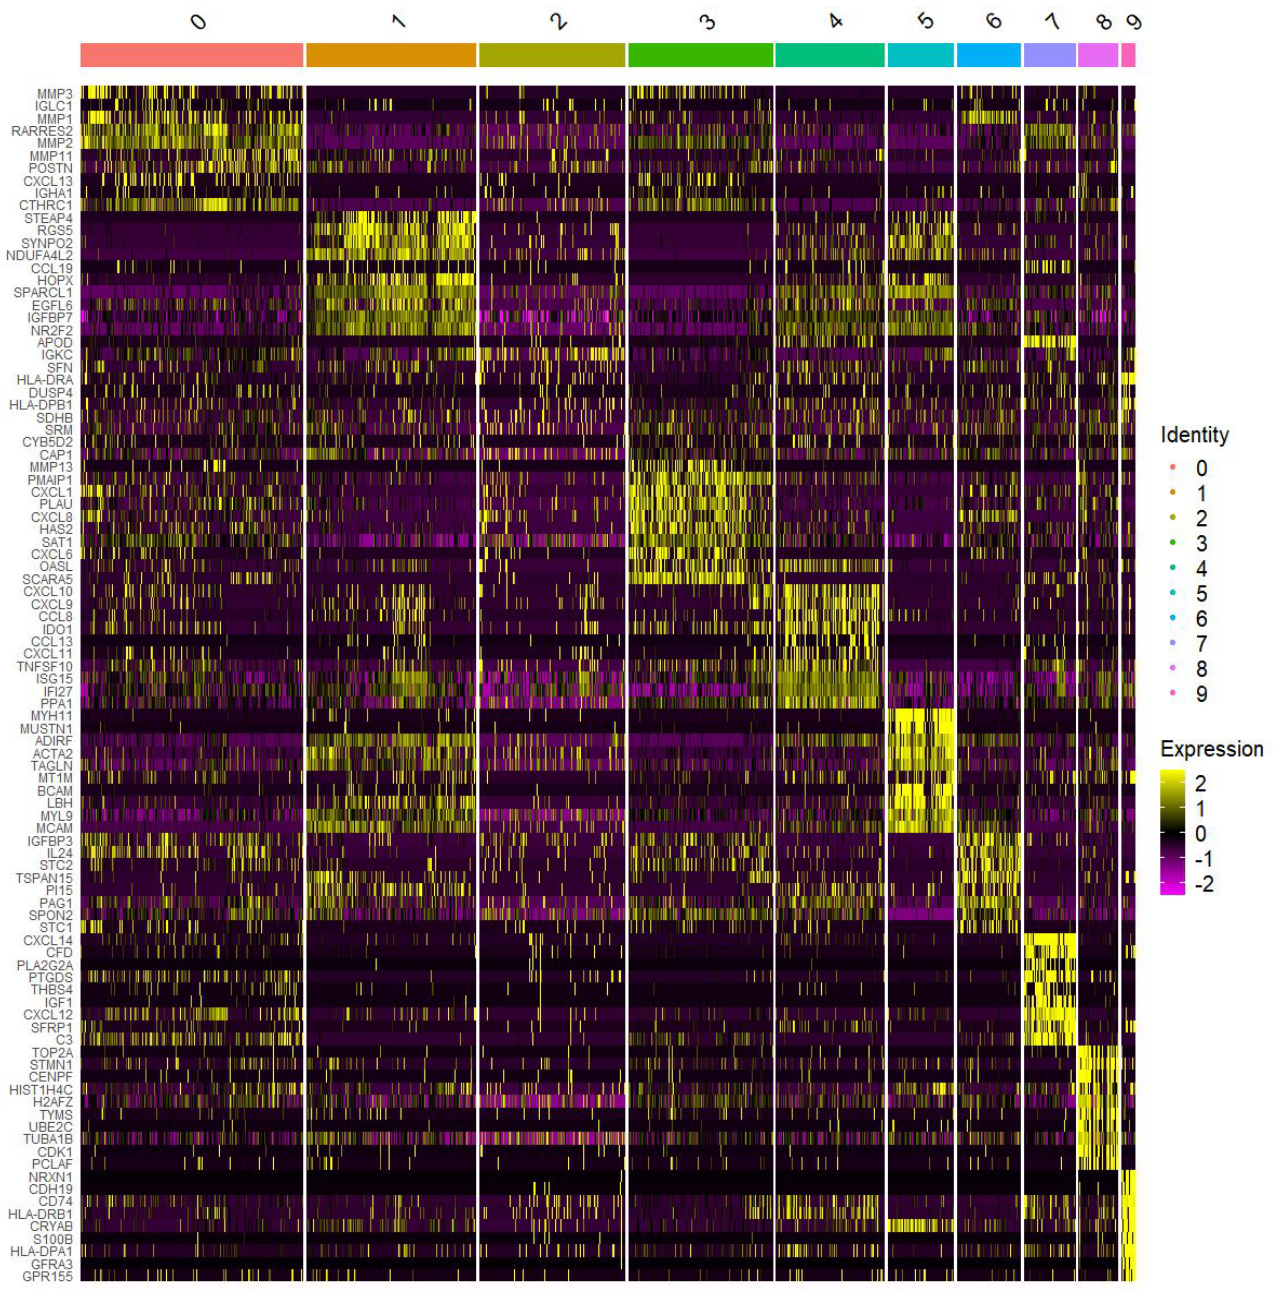

Supplement: CAS-114-4732-s021.pdf [file CAS-114-4732-s021.pdf]
