# Supplementary material for: Single‐cell transcriptomic analysis of gingivo‐buccal oral cancer reveals two dominant cellular programs
Source: PubMed Central journal article supplement — Cancer Sci. 2023 Oct 4;114(12):4732–46. doi: 10.1111/cas.15979 (PMC10728019; doi:10.1111/cas.15979), 2023-10-04

**Figure S16:**

Feature plot showing the distribution and expression of CD274, CD80 and IDO1 genes across (A) 16 clusters from 12 OSCC-GB patients, (B) 13 clusters of myeloid cell population. Color intensity represents the gene expression level.

**(A)**

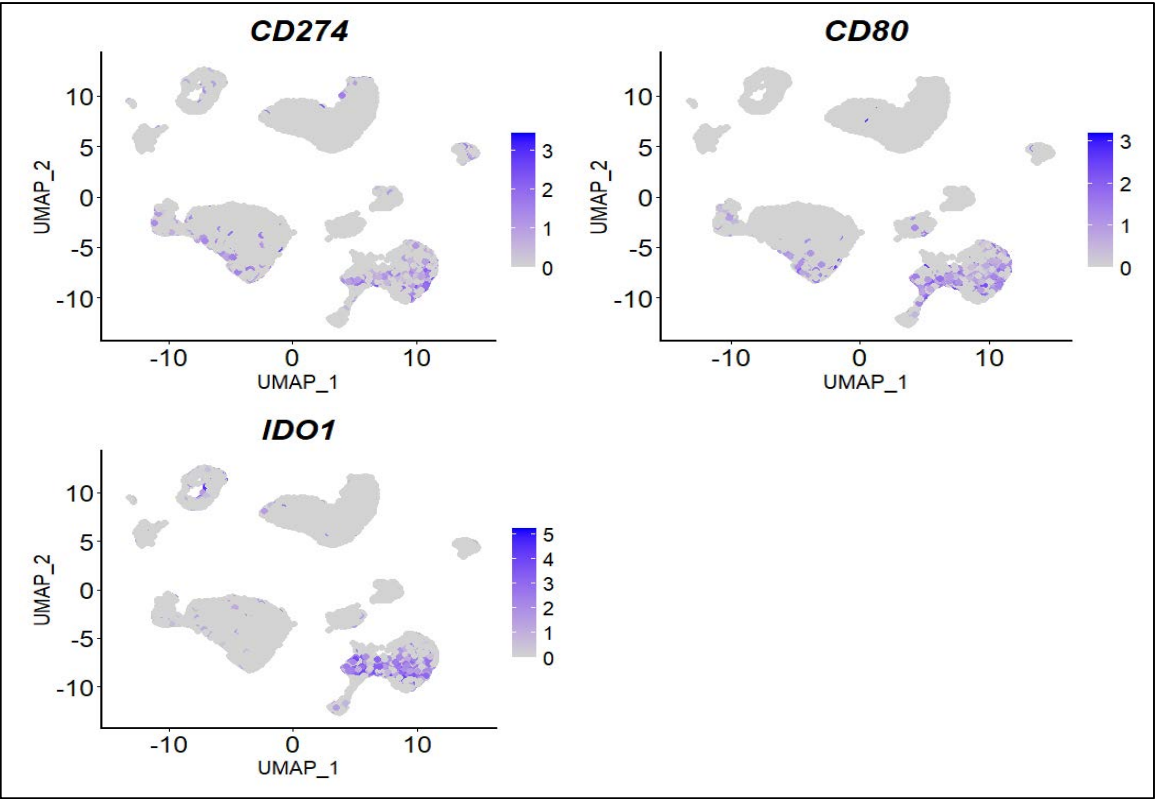

**(B)**

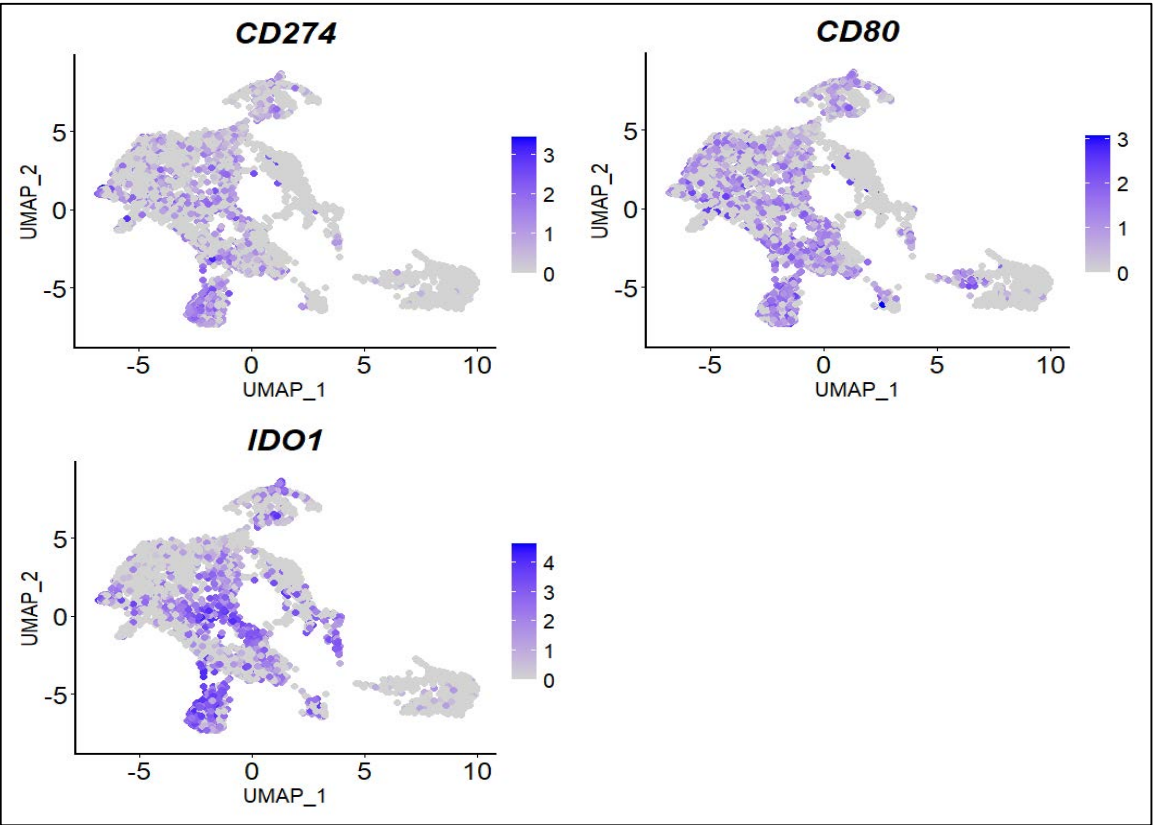

Supplement: CAS-114-4732-s025.pdf [file CAS-114-4732-s025.pdf]
