# Supplementary material for: Single‐cell transcriptomic analysis of gingivo‐buccal oral cancer reveals two dominant cellular programs
Source: PubMed Central journal article supplement — Cancer Sci. 2023 Oct 4;114(12):4732–46. doi: 10.1111/cas.15979 (PMC10728019; doi:10.1111/cas.15979), 2023-10-04

**Figure S8:**

(A) UMAP plot showing CD4-CD8-PLCG2+ T cells from 12 OSCC-GB patients (NIBMG dataset). Each dot represents a cell. UMAP is colored by group. (B) UMAP plot of the expression profile of T cells from 18 HNSCC patients (GSE103322). UMAP is colored by cluster. (C) UMAP plot showing CD4-CD8-PLCG2+ T cells from 18 HNSCC patients (GSE103322). UMAP is colored by group. (D) UMAP plot of the expression profile of T cells from 8 HNSCC patients (GSE164690). UMAP is colored by cluster. (E) UMAP plot showing CD4-CD8-PLCG2+ T cells from 8 HNSCC patients (GSE164690). UMAP is colored by group. (F) Fraction of CD4-CD8-PLCG2+ T cells across OSCC-GB (NIBMG), GSE103322 and GSE164690 datasets. Groups are on the x-axis and cell fraction on the y-axis. (G) UMAP plot of the expression profile of merged T cell populations (T cells from OSCC-GB (NIBMG), GSE103322 and GSE164690 datasets). UMAP is colored by cluster. (H) UMAP plot showing DNT PLCG2+ cells in merged T cell populations. UMAP is colored by group. (I) Fraction of DNT PLCG2+ cells across clusters in merged T cell populations. Cluster Identity are on the x-axis and cell fraction on the y-axis. (J) Barplot showing fraction of T cell populations from OSCC-GB (NIBMG), GSE103322 and GSE164690 datasets across clusters. Cluster Identity are on the x-axis and cell fraction on the y-axis. (K) UMAP plot showing NIBMG DNT PLCG2+ cells in merged T cell populations. UMAP is colored by group. (L) Fraction of NIBMG DNT PLCG2+ cells across clusters in merged T cell populations. Cluster Identity are on the x-axis and cell fraction on the y-axis.

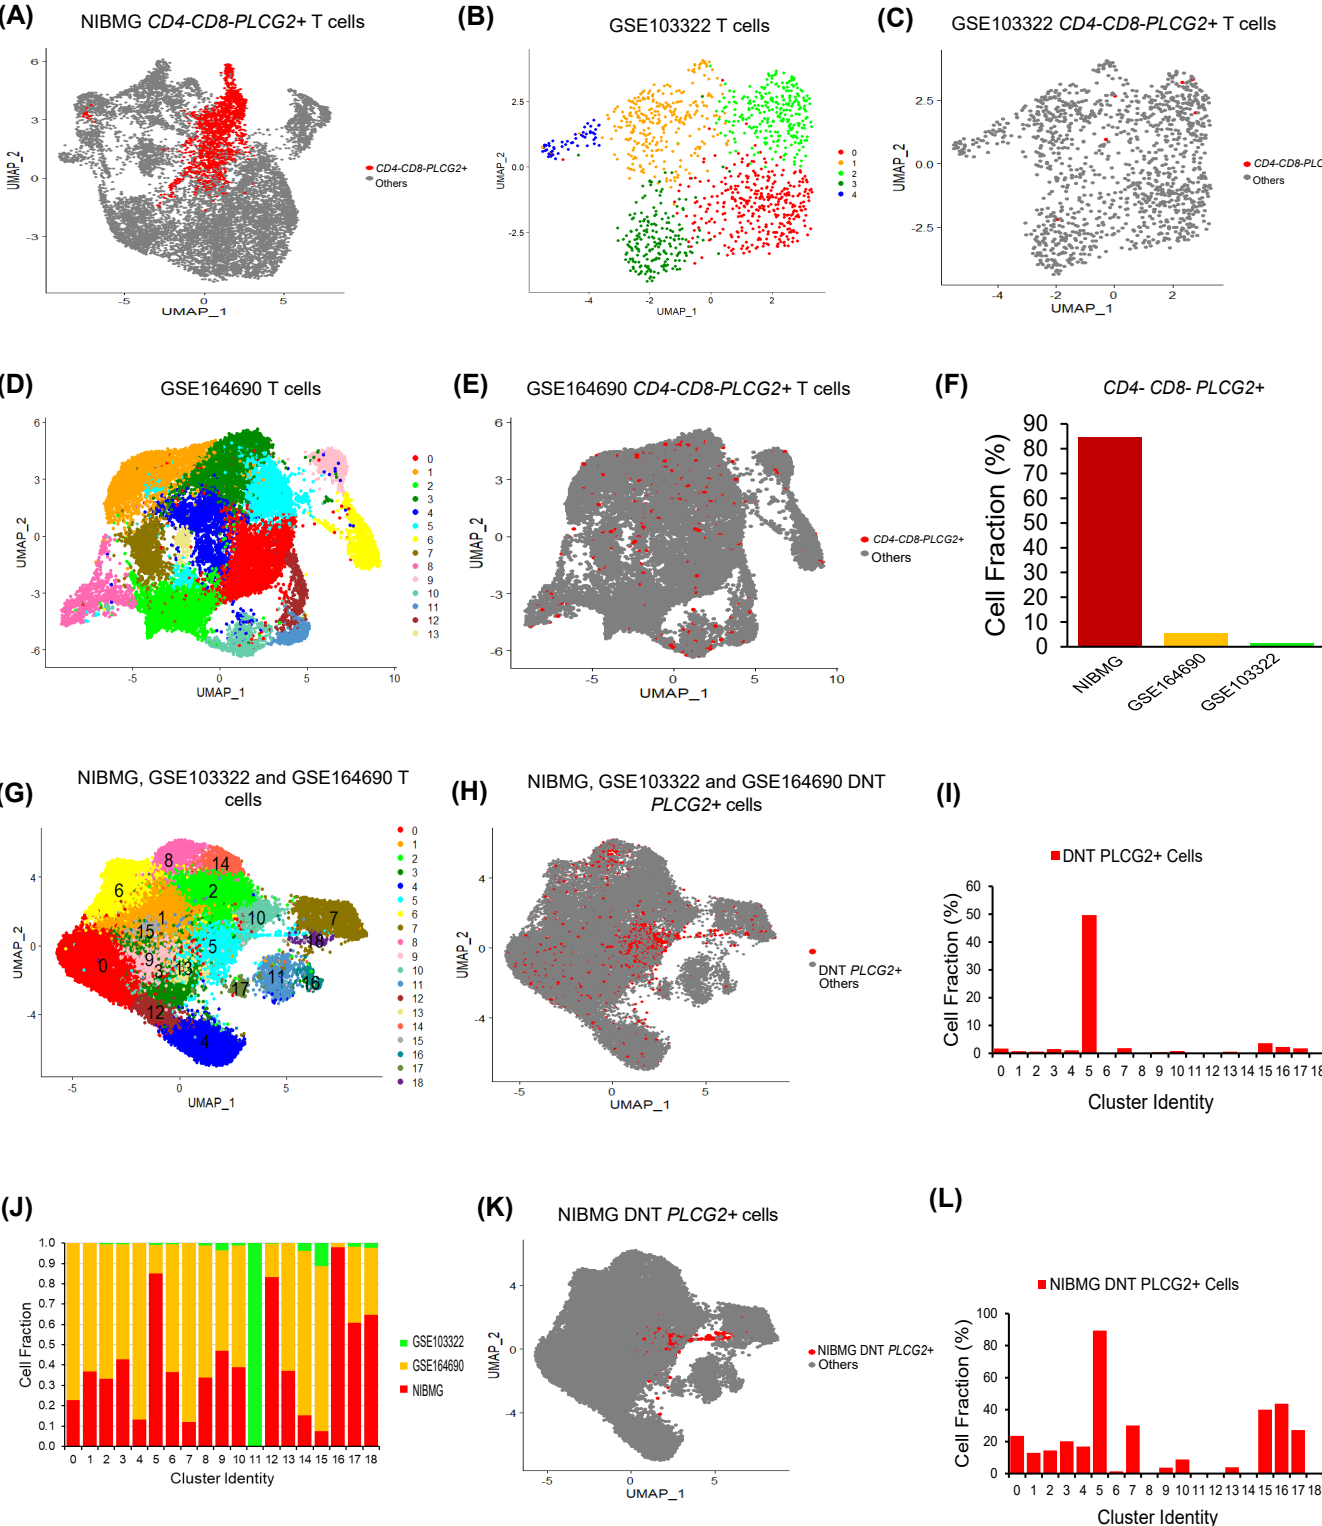

Supplement: CAS-114-4732-s030.pdf [file CAS-114-4732-s030.pdf]
