# Supplementary material for: Single‐cell transcriptomic analysis of gingivo‐buccal oral cancer reveals two dominant cellular programs
Source: PubMed Central journal article supplement — Cancer Sci. 2023 Oct 4;114(12):4732–46. doi: 10.1111/cas.15979 (PMC10728019; doi:10.1111/cas.15979), 2023-10-04

Figure S7:

(A) UMAP plot of the expression profile of malignant cells from 18 HNSCC patients (GSE103322). Each dot represents a cell. UMAP is colored by cluster. Dot plot showing the average expression of pEMT and fetal cell type signatures and cancer testis genes across (B) clusters and (C) patients (Gene signatures are on the x-axis and Cluster/Patient Identity on the y-axis); color represents the average gene expression level. (D) UMAP plot of the expression profile of malignant cells from 8 HNSCC patients (GSE164690). Each dot represents a cell. UMAP is colored by cluster. Dot plot showing the average expression of pEMT and fetal cell type signatures and cancer testis genes across (E) clusters and (F) patients (Gene signatures are on the x-axis and Cluster/Patient Identity on the y-axis); color represents the average gene expression level.

### GSE103322

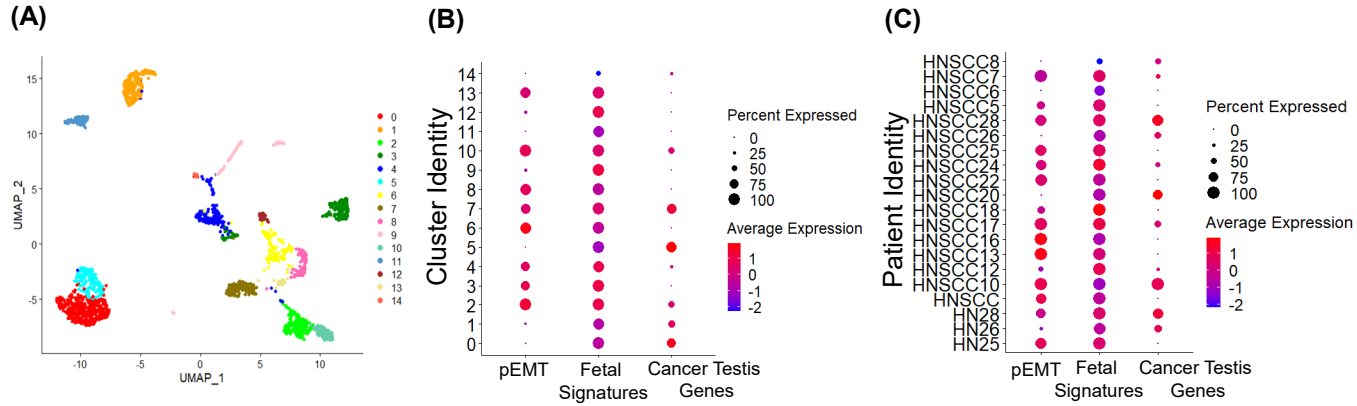

### GSE164690

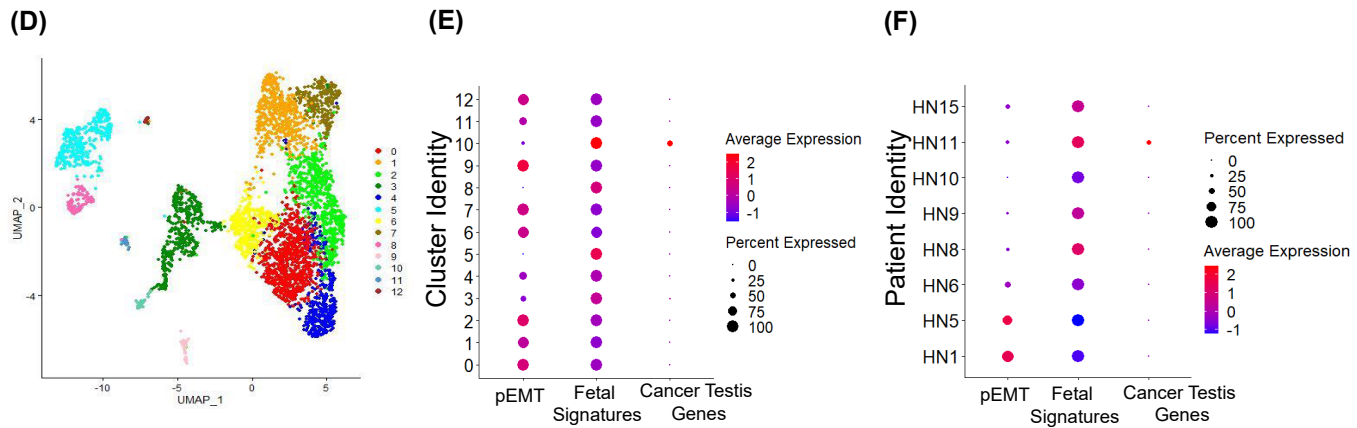

Supplement: CAS-114-4732-s033.pdf [file CAS-114-4732-s033.pdf]
